## Original article

# Association between age at disease onset of anti-neutrophil cytoplasmic antibody–associated vasculitis and clinical presentation and short-term outcomes

Sara Monti <sup>1,2</sup>, Anthea Craven<sup>3</sup>, Catherine Klersy<sup>4</sup>, Carlomaurizio Montecucco<sup>1</sup>, Roberto Caporali <sup>1</sup>, Richard Watts<sup>5</sup>, Peter A. Merkel<sup>6</sup> and Raashid Luqmani<sup>3</sup>; on behalf of DCVAS Collaborators

## Abstract

**Objectives.** ANCA-associated vasculitis (AAV) can affect all age groups. We aimed to show that differences in disease presentation and 6 month outcome between younger- and older-onset patients are still incompletely understood.

**Methods.** We included patients enrolled in the Diagnostic and Classification Criteria for Primary Systemic Vasculitis (DCVAS) study between October 2010 and January 2017 with a diagnosis of AAV. We divided the population according to age at diagnosis: <65 years or ≥65 years. We adjusted associations for the type of AAV and the type of ANCA (anti-MPO, anti-PR3 or negative).

**Results.** A total of 1338 patients with AAV were included: 66% had disease onset at <65 years of age [female 50%; mean age 48.4 years (s.d. 12.6)] and 34% had disease onset at ≥65 years [female 54%; mean age 73.6 years (s.d. 6)]. ANCA (MPO) positivity was more frequent in the older group (48% vs 27%;  $P=0.001$ ). Younger patients had higher rates of musculoskeletal, cutaneous and ENT manifestations compared with older patients. Systemic, neurologic, cardiovascular involvement and worsening renal function were more frequent in the older-onset group. Damage accrual, measured with the Vasculitis Damage Index (VDI), was significantly higher in older patients, 12% of whom had a 6 month VDI ≥5, compared with 7% of younger patients ( $P=0.01$ ). Older age was an independent risk factor for early death within 6 months from diagnosis [hazard ratio 2.06 (95% CI 1.07, 3.97);  $P=0.03$ ].

**Conclusion.** Within 6 months of diagnosis of AAV, patients >65 years of age display a different pattern of organ involvement and an increased risk of significant damage and mortality compared with younger patients.

**Key words:** anti-neutrophil cytoplasmic antibody–associated vasculitis, age, outcome

### Rheumatology key messages

- Age at disease onset is associated with a different clinical presentation in younger patients compared with older patients with AAV.
- Age at onset of AAV influences the short-term outcome.
- Damage accrual and increased mortality risk occur early after diagnosis, especially in patients >65 years of age.

<sup>1</sup>Rheumatology, Fondazione IRCCS Policlinico S. Matteo, University of Pavia, Pavia, Italy, <sup>2</sup>Experimental Medicine, University of Pavia, Pavia, Italy, <sup>3</sup>NDORMS, Rheumatology Department, University of Oxford, Oxford, UK, <sup>4</sup>Biometry and Clinical Epidemiology, Fondazione IRCCS Policlinico S. Matteo, Pavia, Italy, <sup>5</sup>Norwich Medical School, University of East Anglia, Norwich, UK and <sup>6</sup>Division of Rheumatology and Department of Biostatistics,

Epidemiology, and Informatics, University of Pennsylvania, Philadelphia, PA, USA

Submitted 6 October 2019; accepted 17 March 2020

Correspondence to: Sara Monti, Fondazione IRCCS Policlinico S. Matteo, University of Pavia, Pz.le Golgi 2, 27100 Pavia, Italy. E-mail: sara.saramonti@gmail.com

## Introduction

ANCA-associated vasculitis (AAV) can potentially affect all age groups, with a peak incidence in the 6th–7th decades [1, 2]. Disease onset at an older age has been reported to be associated with a higher frequency of renal involvement and worse outcome [3,4]. International recommendations suggest a tailored approach in the management of older patients, with dose adjustments of remission-induction treatment with cyclophosphamide according to age and glomerular filtration rate (GFR) [5]. Nevertheless, the impact of age on the management and outcome of AAV is still largely unknown. Several randomized controlled trials of AAV excluded patients >75 years of age [6, 7] and the available evidence comes mainly from retrospective observational studies [8, 9]. Nonetheless, an intriguing pathogenetic explanation that goes beyond expected epidemiologic data comes from an animal model of ANCA-associated glomerulonephritis. An age-dependent severity of renal damage was demonstrated in older mice injected with anti-MPO antibodies [10]. The concept of immunosenescence is gaining interest in rheumatic diseases [11, 12]. Ageing leads to a series of changes in the innate and adaptive immunity that promote persistent inflammation. Increased susceptibility to external pathogenic agents and impaired tissue-repairing capacity potentially also contribute to a worse course of disease in older patients [12]. A better understanding of the differences in the type of clinical presentation and outcome of AAV according to age will be informative to potentially lead to more rapid diagnosis and development of therapeutic or follow-up strategies to reduce damage and mortality. The aim of this study was to identify distinguishing characteristics of clinical presentations, short-term outcomes and accumulated damage for patients with AAV based on age of disease onset.

## Methods

Data from patients recruited between October 2010 and January 2017 in the Diagnostic and Classification Criteria for Primary Systemic Vasculitis (DCVAS) study was used for this analysis. The DCVAS study is an international observational study of newly diagnosed patients with vasculitis or mimics that was created with the aim of producing new classification and diagnostic criteria for several forms of systemic vasculitides [13]. The University of Oxford is the sponsor of the DCVAS study, with overall ethical approval given by the UK Berkshire Research Ethics (10/H0505/19, 7 May 2010). The DCVAS study was performed in accordance with the 1964 Declaration of Helsinki and ethical approval was obtained by national and local ethics committees in accordance with national legislation. Participants consented to the study and access to their records was granted.

We selected records of patients from the DCVAS study who had a confirmed final diagnosis of AAV [granulomatosis with polyangiitis (GPA), eosinophilic

granulomatosis with polyangiitis (EGPA) or microscopic polyangiitis (MPA)]. Confirmation of the diagnosis was agreed following review of each case by at least one independent expert using the DCVAS external expert review process.

We divided the population according to age at disease onset as <65 years or ≥65 years. We used the following data for the analysis, comparing differences between the younger and older groups: demographics (age, sex, disease duration, ethnicity), comorbid conditions, detailed description of organ systems involved at presentation and laboratory tests (acute phase reactants, full blood count data, creatinine, GFR values and ANCA test results). We assessed the Vasculitis Damage Index (VDI) at 6 months from diagnosis. We analysed mortality at up to 6 months of follow-up (which was the final visit in the DCVAS study).

## Statistical analysis

We used Stata 15.1 (StataCorp, College Station, TX, USA) for all computations. We set statistical significance at a two-sided *P*-value <0.05. We described continuous data with the mean and s.d. or the median and 25th–75th percentiles [interquartile range (IQR)] and categorical data as number and percent. We compared them between age groups with logistic and linear regression models, respectively. We used generalized ordinal logit models for ordinal outcome models (categories of VDI) and checked the proportional odds assumption for verification. To account for intracentre correlation of measures, we computed Huber–White robust standard errors. We further fitted the same models while adjusting for diagnosis (GPA, MPA or EGPA) and for ANCA status: PR3-ANCA, MPO-ANCA or negative. We computed the odds ratios (ORs) and 95% CIs. We computed the rate of death at 6 months per 100 person-years for each age group. We used the log-rank test and the Cox model for comparison. We adjusted the effect of age for a series of potential confounders identified a priori based on the available literature (e.g. renal function impairment, respiratory failure). We reported hazard ratios (HRs) and 95% CIs. We computed both the naïve Harrell's C statistic for model discrimination and the Harrell's C computed on 70% of the cohort and validated in 30% of the cohort, together with its 95% CI. For all models we tested for the interaction of age and confounders (diagnosis type and ANCA status) to exclude a modifying effect of the latter.

We reported detailed comparisons of signs and symptoms between groups as [Supplementary tables](#), available at *Rheumatology* online, with a descriptive aim only.

## Results

### Demographics, diagnosis and baseline characteristics

We included data from 1338 patients with a 6 month final diagnosis of AAV [(GPA, 735 patients (55%); MPA, 334 patients (25%); EGPA, 255 patients (19%); general

diagnosis of AAV, 14 patients (1%]). Among the 878 patients (66% of the total) with younger-onset disease (mean age 48.4 years (s.d. 12.6; range 18–64.96), 50% were female. In the older-onset group [ $\geq 65$  years; mean age 73.6 years (s.d. 6; range 65.03–91)] there were 460 patients (34%), of whom 53.7% were female.

Diagnostic delay (defined by time from onset of symptoms to diagnosis) was greater in the younger group [median 3.90 months (IQR 1.64–11.02) vs 3.04 (1.22–8.29);  $P = 0.036$ ].

The type of AAV according to age is presented in Table 1. Within each diagnostic group, 73% of patients with GPA and 74% of patients with EGPA belonged to the younger group, while 56% of the patients with MPA had an older onset ( $P < 0.001$ ). ANCA-PR3 was more frequent in the younger group compared with the older-onset group (48% vs 35%;  $P = 0.002$ ), while ANCA-MPO was more frequent in the older group (27% in younger patients vs 48% in older patients;  $P < 0.001$ ).

As shown in Table 2, comorbidities were more frequent in the older-onset group, with 85% of patients having at least one comorbid condition at the time of diagnosis of AAV compared with 59% in the younger group ( $P < 0.001$ ). Cardiovascular (CV) comorbidities (hypertension, diabetes mellitus, dyslipidaemia, CV or cerebrovascular ischaemic events) and malignancies were most frequently recorded for older patients (Table 2).

Clinical presentation

The clinical presentation at onset differed significantly between the two groups, as shown in Fig. 1A and B. Frequencies of specific organ system manifestations according to age groups are presented in Supplementary Table 1, available at Rheumatology online.

Patients from the younger-onset group had higher rates of musculoskeletal, cutaneous and ENT manifestations compared with older patients. Inflammatory arthritis was

TABLE 1 Distribution of diagnosis and ANCA according to age groups

| Diagnosis            | Younger-onset<br>AAV < 65 years old (n = 878) | Older-onset<br>AAV $\geq 65$ years old (n = 460) | P-value |
|----------------------|-----------------------------------------------|--------------------------------------------------|---------|
| Type of AAV          |                                               |                                                  | <0.001  |
| GPA, n (%)           | 536 (61)                                      | 199 (44)                                         |         |
| MPA, n (%)           | 189 (22)                                      | 66 (15)                                          |         |
| EGPA, n (%)          | 148 (17)                                      | 186 (41)                                         |         |
| ANCA-PR3, n (%)      | 421 (48)                                      | 161 (35)                                         | 0.001   |
| ANCA-MPO, n (%)      | 240 (27)                                      | 222 (48)                                         | <0.001  |
| ANCA negative, n (%) | 160 (18)                                      | 59 (13)                                          | 0.02    |

TABLE 2 Demographic data and baseline comorbid conditions according to age groups

| Outcome variable       | Younger-onset<br>AAV <65 years<br>(n = 878) | Older-onset<br>AAV $\geq 65$ years<br>(n = 460) | Univariable OR<br>(95% CI) for age<br>$\geq 65$ vs <65 years | P-value | Multivariable OR<br>(95% CI) for age<br>$\geq 65$ vs <65 years | Adjusted<br>P-value <sup>a</sup> |
|------------------------|---------------------------------------------|-------------------------------------------------|--------------------------------------------------------------|---------|----------------------------------------------------------------|----------------------------------|
| Sex, n (%)             |                                             |                                                 |                                                              |         |                                                                |                                  |
| Female                 | 439 (50)                                    | 247 (53.7)                                      |                                                              |         |                                                                |                                  |
| Male                   | 439 (50)                                    | 213 (46.3)                                      | 0.86 (0.69, 1.07)                                            | 0.545   | 0.92 (0.72, 1.19)                                              | 0.174                            |
| Smoker, n (%)          |                                             |                                                 |                                                              |         |                                                                |                                  |
| Never                  | 532 (60.6)                                  | 250 (54.3)                                      |                                                              |         |                                                                |                                  |
| Current/previous       | 346 (39.4)                                  | 210 (45.6)                                      | 1.29 (0.97, 1.72)                                            | 0.077   | 1.31 (0.99, 1.74)                                              | 0.062                            |
| Comorbidities, n (%)   |                                             |                                                 |                                                              |         |                                                                |                                  |
| None                   | 360 (41)                                    | 70 (15.2)                                       | 0.26 (0.19, 0.36)                                            | <0.001  | 0.26 (0.20, 0.33)                                              | <0.001                           |
| Hypertension           | 173 (19.7)                                  | 197 (42.8)                                      | 3.05 (2.24, 4.16)                                            | <0.001  | 2.75 (1.98, 3.82)                                              | <0.001                           |
| Diabetes mellitus      | 51 (5.9)                                    | 68 (14.8)                                       | 2.76 (2.01, 3.79)                                            | <0.001  | 2.56 (1.74, 3.75)                                              | <0.001                           |
| Dyslipidaemia          | 62 (7.1)                                    | 84 (18.3)                                       | 2.94 (2.29, 3.76)                                            | <0.001  | 2.82 (2.01, 3.94)                                              | <0.001                           |
| Coronary heart disease | 30 (3.4)                                    | 53 (11.5)                                       | 3.68 (2.56, 5.29)                                            | <0.001  | 3.59 (2.53, 5.08)                                              | <0.001                           |
| Heart failure          | 5 (0.6)                                     | 10 (2.2)                                        | 3.88 (1.17, 12.84)                                           | 0.026   | 4.71 (1.24, 17.91)                                             | 0.023                            |
| Stroke                 | 9 (1)                                       | 17 (3.7)                                        | 3.71 (1.82, 7.56)                                            | <0.001  | 3.79 (1.90, 7.56)                                              | <0.001                           |
| Peripheral vascular    | 7 (0.8)                                     | 14 (3)                                          | 3.91 (2.29, 6.64)                                            | <0.001  | 3.40 (1.34, 5.05)                                              | 0.022                            |
| COPD                   | 20 (2.3)                                    | 40 (8.7)                                        | 4.09 (2.58, 6.47)                                            | <0.001  | 2.96 (1.92, 4.55)                                              | <0.001                           |
| Asthma                 | 161 (18.3)                                  | 56 (12.2)                                       | 0.62 (0.45, 0.84)                                            | 0.002   | 1.10 (0.79, 1.54)                                              | 0.057                            |
| Malignancy             | 27 (3.1)                                    | 55 (11.9)                                       | 4.28 (2.83, 6.48)                                            | <0.001  | 4.25 (2.70, 6.67)                                              | <0.001                           |

<sup>a</sup>Adjusted for diagnosis and ANCA status.  
COPD: chronic obstructive pulmonary disease.

Fig. 1 Age and clinical presentation<sup>a</sup>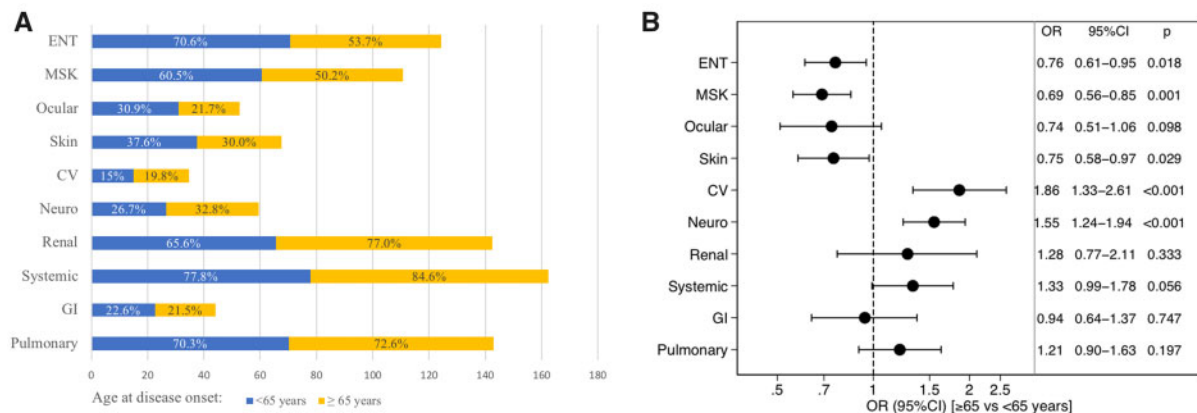

(A) Frequency of involvement of various organ systems at clinical presentation according to age groups. (B) Effect of age at disease onset on clinical presentation. <sup>a</sup>Adjusted for diagnosis and ANCA status. MSK: musculoskeletal; Neuro: neurological; GI: gastrointestinal.

the most frequently reported musculoskeletal feature in the younger group (51.6% vs 33.7%;  $P < 0.001$ ) while muscle weakness was more frequent in older patients (11.1% vs 7.6%;  $P = 0.02$ ). Cutaneous involvement represented by papular lesions was mainly reported in younger patients. All types of ENT manifestations were more frequent in younger patients, even after adjusting for diagnosis type. Within subgroups, exploratory descriptive analyses revealed that ENT involvement was particularly more frequent in GPA and in PR3-ANCA-positive patients who were younger. Significant differences were reported for the frequency of bloody nasal discharge, nasal blockage, anosmia, ageusia, nasal ulcers, septal perforation, hoarse voice and subglottic stenosis (Supplementary Table 1, available at *Rheumatology* online).

Subgroup analyses of the effect of age adjusted for diagnosis and ANCA type on clinical manifestations, detailed for each subgroup, are presented in Supplementary Table 4, available at *Rheumatology* online. The effect of age was not modified by any confounder factor except for musculoskeletal involvement and neurological involvement, for which the effect of age was concomitantly modified by PR3-ANCA positivity and GPA diagnosis, respectively.

Systemic symptoms and neurologic and CV involvement were more frequent in the older-onset group (Fig. 1). In terms of systemic manifestations, fatigue was significantly more frequent in older-onset patients (68.3% vs 56.6%;  $P = 0.01$ ). Night sweats occurred in 25.9% of younger-onset patients compared with 18.3% in older-onset patients ( $P = 0.002$ ). The higher reported frequency of neurologic manifestations in the older group was mainly motor and sensory neuropathies, peripheral nerve involvement in general and, rarely, transient ischaemic attacks. (Supplementary Table 1, available at *Rheumatology* online). CV manifestations were prominent in the older group, with a higher frequency of congestive

heart failure, arrhythmia and murmur. Renal involvement was predominant in older-onset patients in terms of impaired renal function, proteinuria and microscopic haematuria. However, after adjusting for diagnosis and ANCA status, only increased creatinine/reduced GFR remained significant: 57.7% of cases in the older group had an abnormally high creatinine/reduced GFR attributed to active vasculitis vs 35.3% of the younger group.

Overall, ocular, pulmonary and gastrointestinal disease manifestations were equally distributed between the two age groups (Supplementary Table 1, available at *Rheumatology* online). Ocular involvement within the PR3-ANCA subgroup was more frequent in the younger group, as was skin involvement in MPO-ANCA-positive patients. For pulmonary involvement, the only significant difference between groups was for minor haemoptysis (16.7% in the younger group vs 10.6% in the older group;  $P < 0.001$ ). Pulmonary function test abnormalities did not differ between the two groups except for a reduced diffusion capacity of carbon monoxide (DLCO) being more frequent in older-onset patients (Supplementary Table 1, available at *Rheumatology* online). The only gastrointestinal manifestations that differed were abdominal pain and bloody diarrhoea, both more commonly reported in the younger-onset group.

Laboratory findings, after adjustment for diagnosis and ANCA status, were not significantly different according to age at diagnosis except for a higher rate of elevated inflammatory markers, ESR and/or CRP, mainly occurring in the older group (Supplementary Table 2, available at *Rheumatology* online).

#### Damage accrual

Damage accrual measured with the VDI was significantly higher in patients in the older group, of whom 12% had a 6 month VDI score  $\geq 5$ , compared with 7% of patients in the younger-onset group ( $P = 0.01$ ). Individual VDI

Fig. 2 Age and damage accrual<sup>a</sup>

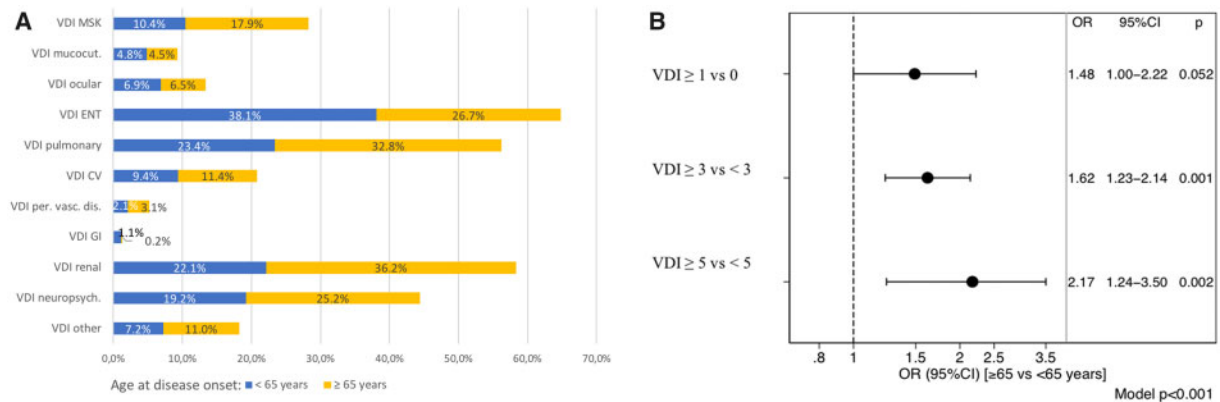

(A) VDI items at the 6 month follow-up according to age groups. (B) Effect of age on increasing damage accrual (VDI scores categorized into 0, 1–2, 3–4 and ≥5). <sup>a</sup>Adjusted for diagnosis and ANCA status. MSK: musculoskeletal; mucocut: mucocutaneous; per.vasc.dis.: peripheral vascular disease; GI: gastrointestinal; neuropsych: neuropsychiatric.

TABLE 3 Multivariable analysis of the factors associated with increased mortality

| Factors                              | Deaths, n | Rate per 100 person-years (95% CI) <sup>a</sup> | HR   | 95% CI      | P-value |
|--------------------------------------|-----------|-------------------------------------------------|------|-------------|---------|
| Age, years                           |           |                                                 |      |             |         |
| <65                                  | 13        | 4.01 (2.40, 7.23)                               | 1    |             |         |
| ≥65                                  | 22        | 12.49 (6.45, 24.68)                             | 1.93 | 1.09, 3.44  | 0.030   |
| Impaired renal function <sup>b</sup> |           |                                                 |      |             |         |
| No                                   | 8         | 2.83 (1.64, 5.09)                               | 1    |             |         |
| Yes                                  | 26        | 12.56 (7.76, 20.88)                             | 2.32 | 1.08, 4.99  | 0.024   |
| Respiratory failure                  |           |                                                 |      |             |         |
| No                                   | 23        | 5.05 (3.03, 8.82)                               | 1    |             |         |
| Yes                                  | 12        | 26.72 (14.37, 51.27)                            | 4.66 | 1.74, 12.47 | 0.002   |
| Diagnosis                            |           |                                                 |      |             | <0.001  |
| GPA                                  | 12        | 4.37 (2.92, 6.87)                               | 1    |             |         |
| MPA                                  | 19        | 15.26 (7.99, 31.63)                             | 3.85 | 2.24, 6.63  | <0.001  |
| EGPA                                 | 4         | 4.22 (1.67, 12.47)                              | 2.96 | 0.84, 10.38 | 0.233   |
| ANCA <sup>c</sup>                    |           |                                                 |      |             | 0.014   |
| Negative                             | 2         | 2.46 (0.59, 19.22)                              | 1    |             |         |
| PR3-ANCA                             | 11        | 5.06 (3.19, 8.99)                               | 6.94 | 0.98, 49.63 | 0.053   |
| MPO-ANCA                             | 20        | 11.51 (5.64, 25.84)                             | 3.31 | 0.37, 29.62 | 0.284   |

Model P < 0.001; naïve Harrell’s C = 0.80; test validating Harrell’s C = 0.68 (95% CI 0.50, 0.86).

<sup>a</sup>No significant interactions between age and diagnosis or ANCA type (P < 0.05 in all cases).

<sup>b</sup>Data missing in 1 patient.

<sup>c</sup>Data missing in 2 patients.

items according to age groups are presented in Fig. 2A and Supplementary Table 3, available at *Rheumatology* online. Older age is significantly associated with a 2-fold increased risk of higher VDI scores [OR 2.17 (95% CI 1.24, 3.50), P = 0.002; Fig. 2B]. Subgroup analyses of the effect of age adjusted for diagnosis and ANCA type on the VDI, detailed for each subgroup, are presented in Supplementary Table 5, available at *Rheumatology* online, confirming no modification of the effect of age on damage.

### Mortality

There were 13 (1.49%) deaths recorded in the younger-onset group and 22 (4.8%) in the older-onset group within 6 months from diagnosis. In the multivariable analysis, older age conferred an independent risk of early mortality, even after adjusting for diagnosis, ANCA specificity, respiratory failure and impaired renal function at presentation [HR 2.06 (95% CI 1.07, 3.97), P = 0.03]. The apparent model discrimination was excellent (naïve Harrell’s C = 0.80), although it decreased to 0.68 (95%

CI 0.50–0.86) with the testing validating approach (Table 3). Kaplan–Meier survival curves are presented in Supplementary Fig. 1, available at *Rheumatology* online. Subgroup analyses of the factors associated with increased mortality are shown in Supplementary Table 6. The causes of death were as follows: pulmonary haemorrhage (2 cases in each group), renal failure (3 in the younger group vs 1 in the older group), myocardial infarction (1 in the younger group vs 4 in the older group), malignancy (1 in the older group), infections (3 in the younger group vs 10 in the older patients) and unknown (4 in the younger group vs 4 in the older group).

## Discussion

The effects of ageing on physiological and pathological processes are gaining increasing interest with the lengthening of life expectancy and the improved prognosis of several conditions, including AAV. This is the first large study demonstrating that age at disease onset appears to influence the clinical presentation and prognosis of AAV. We demonstrated that age >65 years is an independent risk factor for significant damage accrual and mortality in the early phases (the first 6 months) of the disease. Recently there has been a move to classify AAV based on clinical presentation or ANCA status rather than clinical diagnosis [14–16]. To fully capture the impact of age at disease onset on the clinical presentation and course of disease we adjusted all comparisons for the type of AAV (anti-PR3, anti-MPO or negative).

Consistent with previous epidemiologic data [17], we demonstrated that patients with MPA were more likely to be >65 years of age, while EGPA and GPA were more frequent in the younger group. AAV is generally considered a disease of older people, with a peak incidence in the 6th–7th decades of life [18]. However, in this large international cohort, 66% of patients had disease onset at <65 years of age. This finding does not seem to be related to increased disease awareness and earlier diagnosis, since the diagnostic delay was more frequent in the younger group. It is possible that following the onset of AAV, an older patient with pre-existing comorbidity might seek medical attention earlier than an otherwise previously healthy younger individual. The severity of clinical manifestations (with more prominent systemic, neurologic and renal symptoms in the older group) might also explain the difference in time to diagnosis. The management of a potentially life-threatening systemic disease in older patients poses a series of challenges [19]. We demonstrated that 85% of older patients have at least one comorbid condition, mainly CV disease. The CV burden is further increased in AAV beyond that associated with traditional risk factors [20, 21]. Older age has previously been identified as a risk factor for the development of CV events within 5 years from the diagnosis of GPA or MPA [22].

In this study, cardiovascular manifestations were significantly more frequent as the initial presentation of

AAV in the older-onset group. The development of new CV risk factors, particularly the VDI item ‘diabetes’, was also significantly more common in older patients. Our data highlight the need for a personalized approach to implement a CV risk management approach at least in patients with a diagnosis of AAV at an older age.

This study demonstrated that older-onset patients experience severe manifestations of disease with predominant neurologic, CV, renal (in terms of worsening renal function) and systemic manifestations compared with the more common musculoskeletal, cutaneous and ENT manifestations in the younger group. Bomback *et al.* [9] reported on the benefit of immunosuppression in reducing the risk of death and end-stage renal disease (ESRD) even in the oldest patients (>80 years) with glomerulonephritis in AAV. Nevertheless, the results of the only randomized trial specifically addressing a tailored therapeutic approach to older patients (≥65 years) with AAV addressed the significantly higher risk of this group of patients to develop serious adverse events, particularly infections. The trial demonstrated that reduced glucocorticoid and cyclophosphamide regimens are safer in older patients without affecting the remission rates [23].

This study demonstrated a higher mortality rate in the very early stages of the disease (first 6 months from diagnosis) in patients with disease onset at ≥65 years. Although we did not perform an adjustment for expected age-related mortality rates, only three patients in the older group were ≥85 years of age and 87% of patients were <80 years of age. Therefore we can speculate that the excessive mortality rate due to age itself, independent of vasculitis- or treatment-related complications, was not the main determinant for reduced survival in our study population. In the multivariable analysis, older age conferred an increased risk of early mortality together with impaired renal function and respiratory failure at onset, as well as diagnosis and PR3-ANCA. Nevertheless, an analysis of four European Vasculitis Study Group trials reported that the majority (59%) of early deaths within 1 year from AAV diagnosis are attributable to adverse events rather than to disease complications [24]. In our cohort, infections represented the cause of death in 54% of older-onset patients compared with 23% in the younger group. Harper and Savage [25] retrospectively collected outcome data on 233 patients with AAV who were >65 years of age compared with a younger cohort and reported a significantly increased risk of infections in this age group associated with poor prognosis. Higher infection rates have been attributed to increased rates of pulmonary involvement in AAV patients with older onset [26]. We did not find an age-specific trend for lung involvement; however, we did demonstrate a correlation between respiratory failure at diagnosis and a 4-fold increased mortality risk. We observed that older patients are at higher risk of accumulating damage in the early phase of disease with significantly higher VDI scores (mainly due to renal and treatment-related complications components).

The results of the study highlight the importance of optimizing preventive strategies to reduce the risk of infections and damage accrual, especially in patients newly diagnosed with AAV at  $\geq 65$  years of age. A tighter follow-up might be warranted in these patients to detect these complications early and potentially prevent excessive death risk.

Our study has some limitations. We made use of data collected from the DCVAS study, which was not an epidemiological study to assess the prevalence of AAV by age. There is a potential recruitment bias based on disease severity that might have been unbalanced between age groups. We performed multiple exploratory analyses based on detailed presenting symptoms that might have an impact on the statistical significance of the results. Nevertheless, only a limited number of variables were assessed as correlated outcomes assessed in the study. Moreover, we could not analyse the presence of differences in therapeutic choices, effectiveness and safety between age groups. This does not allow us to consider unbalanced treatment choices as a potential confounding factor for the assessed outcomes. The relatively short follow-up does not allow assessment of the long-term influence of age at diagnosis. Previous reports have demonstrated significantly higher mortality rates, especially in the first year after diagnosis, with a reduction in the mortality risk thereafter [9]. Long-term studies are needed to address this aspect. The higher age-related mortality expected in the older group and a selection bias towards more patients with more severe disease need to be considered as potential sources of bias for these findings. Nevertheless, this is the largest prospective study conducted to date to assess the influence of age on the clinical presentation and outcome of AAV, demonstrating a series of age-specific characteristics and challenges that will be useful to improve a more personalized management of what it is now considered to be a disease of older patients.

## Conclusion

In conclusion, this study describes age-related clinical differences in disease presentation and short-term outcomes among patients with newly diagnosed AAV, with worse damage accrual and increased risk of mortality in patients with older onset of disease. These findings raise interesting questions about the interplay between age and disease pathogenesis in this complex set of diseases.

## Acknowledgements

**DCVAS collaborators:** Katerina Achilleos, Southend University Hospital NHS Foundation Trust, UK; Matthew Adler, Frimley Health NHS Foundation Trust, UK; Marco A. Alba, Hospital Clínic Barcelona, Spain; Marco A. Alba, Instituto Nacional de Enfermedades Respiratorias, Mexico; Daniel A. Albert, Dartmouth-Hitchcock Medical Center, USA; Fatma Alibaz-Oner, Marmara University

Medical School, Turkey; Paul Allcoat, NHS Fife, UK; Koichi Amano, Saitama Medical University, Japan; Manishka Amarasuriya, University of Colombo Medical Unit, Sri Lanka; Naomi A. Amudala, Boston University, USA; Jacqueline Andrews, Leeds Teaching Hospitals & University of Leeds, UK; Amy M. Archer, University of Pennsylvania, USA; Yoshihiro Arimura, Kyorin University Hospital, Japan; Inoshi Atukorala, University of Colombo Medical Unit, Sri Lanka; Elsa Azevedo, Centro Hospitalar São João, Portugal; Shruti Bajad, Medanta Delhi, India; Corisande Baldwin, University of Calgary, Canada; Lillian J. Barra, St. Joseph's Health Care London, Canada; Bo Baslund, Rigshospitalet, Denmark; Neil Basu, NHS Grampian, UK; Mahire Baykal, Hacettepe University, Turkey; Christoph Berger, Universität Basel, Switzerland; Ewa Berglin, Umeå University Hospital, Sweden; Emilio Besada, University Hospital of North Norway, Norway; Mamta Bhardwaj, Medanta Delhi, India; Antje Bischof, Universität Basel, Switzerland; Daniel Blockmans, University Hospital Leuven, Belgium; Janet Blood, Salford Royal NHS Foundation Trust, UK; Juliana Bordignon Draibe, Hospital Bellvitge, Spain; Sarah Brand, Nottingham University Hospitals NHS Trust, UK; Mariana Brandao, Centro Hospitalar do Porto, Portugal; Ian N. Bruce, Manchester University NHS Foundation Trust, UK; Amanda Butler, Nottingham University Hospitals NHS Trust, UK; Leonard H. Calabrese, Cleveland Clinic, USA; Daniel Camprubi Ferrer, Hospital Bellvitge, Spain; Simon Carrette, University of Toronto, Canada; Diana Carmona, Santa Maria Hospital, Portugal; Helga Ceunen, University Hospital Leuven, Belgium; Kuntal Chakravarty, Barking, Havering and Redbridge University Hospitals NHS Trust, Queen's Hospital, UK; Peter T. Chapman, Christchurch Hospital, University of Otago, Christchurch, New Zealand; Zdenka Chocova, General University Hospital, Prague, Czech Republic; Sharon A. Chung, University of California, San Francisco, USA; Weiping Ci, Anzhen Hospital, Capital Medical University, China; Maria C. Cid, Hospital Clínic Barcelona, Spain; Tiffany M. Clark, Cleveland Clinic, USA; Michael R. Clarkson, Cork University Hospital, Ireland; Felipe de Jesus Contreras-Rodríguez, Instituto Nacional de Enfermedades Respiratorias, Mexico; Richard Conway, St. Vincent's University Hospital, Ireland; Kelly Cooke, Staffordshire & Stoke on Trent Partnership NHS Trust, UK; Xavier Corbella Virós, Hospital Bellvitge, Spain; Ana Cordeiro, Hospital Garcia de Orta, Portugal; Andreia Costa, Centro Hospitalar São João, Portugal; Anthea Craven, Oxford University Hospitals NHS Foundation Trust, UK; Karen Culfear, Basildon and Thurrock University Hospitals NHS Foundation Trust, UK; Thomas Daikeler, Universität Basel, Switzerland; Debashish Danda, Christian Medical College & Hospital, India; Siddharth K. Das, CSM Medical Center, India; Bhaskar Dasgupta, Southend University Hospital NHS Foundation Trust, UK; Alice M. De Castro, Santa Maria Hospital, Portugal; Natasha Dehghan, University of Pennsylvania, USA; Roni Devassy, University of Pennsylvania, USA; Navjot Dhindsa, University of Manitoba, Canada; Andreas P.

Diamantopoulos, Hospital of Southern Norway Trust Kristiansand, Norway; Haner Direskeneli, Marmara University Medical School, Turkey; Hiroaki Dobashi, Kagawa University Hospital, Japan; Du Juan, Anzhen Hospital, Capital Medical University, China; Maumer Durrani, Epsom and St Helier University Hospitals NHS Trust, UK; Clive Edelsten, East Suffolk & North Essex NHS Foundation Trust, UK; Johanna Eifert, Universitätsklinikum Jena, Germany; Sallie Elhayek, St. Joseph's Health Care London, Canada; Sunhoury Elsideeg, Southend University Hospital NHS Foundation Trust, UK; Tomomi Endo, Kitano Hospital, Japan; Abdulsamet Erden, Hacettepe University, Turkey; Burak Erer, Istanbul University, Faculty of Medicine, Turkey; Per Eriksson, Linköping University, Sweden; Zeynep Erturk, Marmara University Medical School, Turkey; Georgina Espigol-Frigolé, Hospital Clínic Barcelona, Spain; Mara Felicetti, Azienda Ospedaliera, University of Padua, Italy; Alaistair Ferraro, Nottingham University Hospitals NHS Trust, UK; José M. Ferro, Santa Maria Hospital, Portugal; Aurore Fifi-Mah, University of Calgary, Canada; Luis Felipe Flores-Suárez, Instituto Nacional de Enfermedades Respiratorias, Mexico; Oliver Flossmann, Royal Berkshire NHS Foundation Trust, UK; Deirdre Flynn, Cork University Hospital, Ireland; João Eurico Fonseca, Santa Maria Hospital, Portugal; Jayne Foot, Taunton and Somerset NHS Trust, UK; Michelle Foote, University of Ottawa, Canada; Lindsay Forbess, Cedars-Sinai Medical Center, USA; Shouichi Fujimoto, Miyazaki University Hospital, Japan; Kazuhito Fukuoka, Kyorin University Hospital, Japan; Carolina Furtado, Santa Maria Hospital, Portugal; Shunsuke Furuta, Chiba University, Japan; Angelo L. Gaffo, University of Alabama, Birmingham, USA; Phil Gallagher, St. Vincent's University Hospital, Ireland; Na Gao, Anzhen Hospital, Capital Medical University, China; Paul Gatenby, Canberra Hospital, Australia; Nagui Gendi, Basildon and Thurrock University Hospitals NHS Foundation Trust, UK; Ruth Gerales, Santa Maria Hospital, Portugal; Anneleen Gerits, University Hospital Leuven, Belgium; Andrea Gioffredi, University of Parma, Azienda Ospedaliera, Italy; Luke Gomples, Taunton and Somerset NHS Trust, UK; Maria João Gonçalves, Santa Maria Hospital, Portugal; Prisca Gondo, Southend University Hospital NHS Foundation Trust, UK; Anne Graham, North Cumbria University Hospitals, UK; Rebecca Grainger, University of Otago Wellington, New Zealand; David T. Gray, Oxford University Hospitals NHS Foundation Trust, UK; Peter C. Grayson, Boston University, USA; Laura Griffiths, York Teaching Hospitals NHS Foundation Trust, UK; Yanqiu Guo, Anzhen Hospital, Capital Medical University, China; Rajiva Gupta, Medanta Delhi, India; Micael Gylling, Linköping University, Sweden; Rula A. Hajj-Ali, Cleveland Clinic, USA; Nevlin Hammam, Assiut University, Egypt; Masayoshi Harigai, Tokyo Medical and Dental University Hospital, Japan; Lorraine Hartley, Waikato District Health Board, New Zealand; Janine Haslett, Christchurch Hospital, University of Otago, Christchurch, New Zealand; Alaa Hassan, North Cumbria University Hospitals, UK; Gulen Hatemi, Istanbul University, Cerrahpasa Medical School, Turkey; Bernhard Hellmich, Kreiskliniken Esslingen, Germany; Liesbet Henckaerts, University Hospital Leuven, Belgium; Joerg C. Henes, University Tuebingen, Germany; Joanna Hepburn, NHS Greater Glasgow & Clyde, UK; Vera Herd, NHS Grampian, UK; Christoph Hess, Universität Basel, Switzerland; Catherine Hill, Queen Elizabeth Hospital, Australia; Andrea Hinojosa-Azaola, Instituto Nacional de Ciencias Médicas y Nutrición Salvador Zubirán, Mexico; Junichi Hirahashi, University of Tokyo Hospital, Japan; Fumio Hirano, Tokyo Medical and Dental University Hospital, Japan; Alojzija Hočevar, University Medical Centre Ljubljana, Slovenia; Julia Holle, Klinikum Bad Bramstedt, Germany; Nicole Hollinger, Kreiskliniken Esslingen, Germany; Sakae Homma, Toho University Hospital, Japan; Theresa Howard, University of Kansas Medical Center Research Institute, USA; Rachel K. Hoyles, Oxford University Hospitals NHS Foundation Trust, UK; Zdenka Hruskova, General University Hospital, Prague, Czech Republic; Gayle Hutcheon, NHS Grampian, UK; Maria Ignacak, University of Jagiellonian, Poland; Annette Igney-Oertel, University Tuebingen, Germany; Kei Ikeda, Chiba University, Japan; Noriko Ikegaya, Kyorin University Hospital, Japan; Samyukta Jagadeesh, Mount Sinai Hospital, Toronto, Canada; Jane Jaquith, Mayo Clinic, USA; David R. W. Jayne, Cambridge University Hospitals NHS Foundation Trust, UK; Teresa Jewell, Taunton and Somerset NHS Trust, UK; Colin Jones, York Teaching Hospitals NHS Foundation Trust, UK; Abhay Joshi, Wye Valley NHS Trust, UK; Umut Kalyoncu, Hacettepe University, Turkey; Sevil Kamali, Istanbul University, Faculty of Medicine, Turkey; Sanjeet Kamath, Staffordshire & Stoke on Trent Partnership NHS Trust, Haywood UK; Kan Sow Lai, Penang General Hospital, Malaysia; Shinya Kaname, Kyorin University Hospital, Japan; Suresh Kanchinadham, Nizam's Institute of Medical Sciences, India; Ömer Karadağ, Hacettepe University, Turkey; Miho Karube, Kyorin University Hospital, Japan; Marek Kaszuba, University of Jagiellonian, Poland; Ramanjot Kaur, Medanta Delhi, India; Tamihito Kawakami, St. Marianna University Hospital Dermatology, Japan; Soko Kawashima, Kyorin University Hospital, Japan; Nader Khalidi, St. Joseph's Healthcare Hamilton, Canada; Asad Khan, Southend University Hospital NHS Foundation Trust, UK; Masao Kikuchi, Miyazaki University Hospital, Japan; Levent Kilic, Hacettepe University, Turkey; Makiko Kimura, Kameda Medical Centre, Japan; Maria J. King, Cambridge University Hospitals NHS Foundation Trust, UK; Sebastian Klapa, University of Lübeck, Germany; Rainer Klocke, Dudley Group NHS Foundation Trust, UK; Tatsuo Kobayashi, Kameda Medical Centre, Japan; Shigeto Kobayashi, Juntendo University Koshigaya Hospital, Japan; Yoshinori Komagata, Kyorin University Hospital, Japan; Andreas Kronbichler, Medical University Innsbruck, Austria; Pawel Kuczia, University of Jagiellonian, Poland; Mandal Santosh Kumar, Christian Medical College & Hospital, Vellore, India; Miho Kurosawa, University Tokyo Hospital, Japan; Peter



Lamprecht, University of Lübeck, Germany; Carol A. Langford, Cleveland Clinic, USA; Peter Lanyon, Nottingham University Hospitals NHS Trust, UK; Catherine Laversuch, Taunton and Somerset NHS Trust, UK; Sang Jin Lee, Seoul National University Hospital, Korea; Simona Leoni, San Raffaele Scientific Institute, Italy; Jing Li, Peking Union Medical College Hospital, China; Kimberly Liang, University of Pittsburgh, USA; Patrick Liang, Centre Hospitalier Universitaire de Sherbrooke, Canada; Hua Liao, Anzhen Hospital, Capital Medical University, China; Lim Ai Lee, Penang General Hospital, Malaysia; Raashid A. Luqmani, Oxford University Hospitals NHS Foundation Trust, UK; Amanda Lyle, Mid Essex Hospital Services NHS Trust, UK; Matthew MacDonald, University of Pennsylvania, USA; Sarah L. Mackie, Leeds Teaching Hospitals & University of Leeds, UK; Leah Madden, University of Pennsylvania, USA; Malgorzata Magliano, Buckinghamshire Healthcare NHS Trust, Stoke Mandeville Hospital, UK; Hirofumi Makino, Okayama University Hospital, Japan; Ashima Makol, Mayo Clinic, USA; Ritu Malaiya, Epsom and St Helier University Hospitals NHS Trust, UK; Anshuman Malaviya, Mid Essex Hospital Services NHS Trust, UK; Ramesh Manthri, Nizam's Institute of Medical Sciences, India; Federica Maritati, University of Parma, Italy; Ana Martins da Silva, Centro Hospitalar do Porto, Portugal; Justin C. Mason, Imperial College Healthcare NHS Trust, UK; Cecilia Matara, Cambridge University Hospitals NHS Foundation Trust, UK; Kazuo Matsui, Kameda Medical Centre, Japan; Eric L. Matteson, Mayo Clinic, USA; Dawn McBride, University of Pittsburgh, USA; Keith McCullough, York Teaching Hospitals NHS Foundation Trust, UK; Lucy McGeoch, NHS Greater Glasgow & Clyde, UK; John McLaren, NHS Fife, UK; Caitlin McMillan, University of Kansas Medical Center Research Institute, USA; Naval Mendiratta, Medanta Delhi, India; Ajit Menon, Staffordshire & Stoke on Trent Partnership NHS Trust, UK; Dimos Merinopoulos, Southend University Hospital NHS Foundation Trust, UK; Peter A. Merkel, Boston University, USA; Peter Merkel, University of Pennsylvania, USA; Sandra Messier, St. Joseph's Healthcare Hamilton, Canada; Robert G. Micheletti, University of Pennsylvania, USA; Karen Mills, Norfolk and Norwich University Hospitals NHS Foundation Trust, UK; Nataliya Milman, University of Ottawa, Canada; Masahiro Minoda, Kameda Medical Centre, Japan; Ranjana Walker Minz, PGIMER, Chandigarh, India; Claudia Möck, Klinikum Bad Bramstedt, Germany; Aladdin J. Mohammad, Lund University, Sweden; Sergey Moiseev, Sechenov First Moscow State Medical University, Russia; Marta Moitinho, Santa Maria Hospital, Portugal; Eamonn Molloy, St. Vincent's University Hospital, Ireland; Paul A. Monach, Boston University, USA; Marian Montgomery, Oxford University Hospitals NHS Foundation Trust, UK; Frank Moosig, Klinikum Bad Bramstedt, Germany; Manoosh Moradizadeh, St. Joseph's Health Care London, Canada; Matthew Morgan, University Hospitals Birmingham NHS Foundation Trust, UK; Ann W. Morgan, Leeds Teaching Hospitals & University of Leeds, UK; Ann-Marie Morgan, Oxford University Hospitals NHS Foundation Trust, UK; Alice Muir, Nottingham University Hospitals NHS Trust, UK; Chetan Mukhtyar, Norfolk and Norwich University Hospitals NHS Foundation Trust, UK; Antje Müller, University of Lübeck, Germany; Francesco Muratore, Azienda Ospedaliera di Reggio Emilia, Italy; Eri Muso, Kitano Hospital, Japan; Ritambhara Nada, PGIMER, Chandigarh, India; Hiroshi Nakajima, Chiba University, Japan; Toshiki Nakajima, Kyoto University Hospital, Japan; Hiroto Nakano, Kameda Medical Centre, Japan; Anupapama Nandagudi, Basildon and Thurrock University Hospitals NHS Foundation Trust, UK; Thomas Neumann, Universitätsklinikum Jena, Germany; Ying Fun Ng, Penang General Hospital, Malaysia; Kooi Heng Ng, Penang General Hospital, Malaysia; Estela L. Nogueira, Santa Maria Hospital, Portugal; Nilesh Nolkha, Royal Wolverhampton NHS Trust, UK; Dan Nordström, Helsinki University Central Hospital, Finland; Pavel Novikov, Sechenov First Moscow State Medical University, Russia; Asanka Nugaliyadde, Basildon and Thurrock University Hospitals NHS Foundation Trust, UK; John L. O'Donnell, Christchurch Hospital, University of Otago, Christchurch, New Zealand; Jennifer O'Donoghue, Oxford University Hospitals NHS Foundation Trust, UK; Lorraine O'Neill, St. Vincent's University Hospital, Ireland; Edmond O'Riordan, Salford Royal NHS Foundation Trust, UK; Margaret Oatley, East Suffolk & North Essex NHS Foundation Trust, UK; Kosu Okubo, University Tokyo Hospital, Japan; Elena Oliva, University of Parma, Azienda Ospedaliera, Italy; Hideto Oshikawa, Kameda Medical Centre, Japan; Yuichiro Ota, Keio University Hospital, Japan; Roberto Padoan, Azienda Ospedaliera, University of Padua, Italy; Christian Pagnoux, University of Toronto, Mount Sinai Hospital, Canada; Lili Pan, Anzhen Hospital, Capital Medical University, China; Kalliopi Panaritis, McGill University Health Centre, Canada; Jin Kyun Park, Seoul National University Hospital, Korea; Sanjeev Patel, Epsom and St Helier University Hospitals NHS Trust, UK; Pravin Patil, Southend University Hospital NHS Foundation Trust, UK; Giulia Pazzola, Azienda Ospedaliera di Reggio Emilia, Italy; Adrian Peall, Wye Valley NHS Trust, UK; Fiona Pearce, Nottingham University Hospitals NHS Trust, UK; Seval Pehlevan, Fatih University, Turkey; Liliana Pereira, Hospital Garcia de Orta, Portugal; Tom Pettersson, Helsinki University Central Hospital, Finland; Christian A. Pineau, McGill University Health Centre, Canada; Laura Pirilä, Turku University Hospital, Finland; Bartłomiej Poglodek, University of Jagiellonian, Poland; Cristina Ponte, Santa Maria Hospital, Portugal; Sergio Prieto-González, Hospital Clínic Barcelona, Spain; Sangeetha R. Priya, Christian Medical College & Hospital, India; Bally Prewal, East Suffolk & North Essex NHS Foundation Trust, UK; Silke Purschke, Universität Basel, Switzerland; Jukka Putaala, Helsinki University Central Hospital, Finland; Stefanie Quickert, Universitätsklinikum Jena, Germany; Vicki Quincey, Waikato District Health Board, New Zealand; Subhra Raghuvanshi, Nottingham University Hospitals NHS Trust, UK; Liza Rajasekhar, Nizam's Institute of

Medical Sciences, India; Dwarakanathan Ranganathan, Royal Brisbane & Women's Hospital, Australia; Manish Rathi, PGIMER, Chandigarh, India; David Rees, Wye Valley NHS Trust, UK; Frances Rees, Nottingham University Hospitals NHS Trust, UK; Ulrike Renken, Manchester University NHS Foundation Trust, UK; Giovanna Restuccia, Azienda Ospedaliera di Reggio Emilia, Italy; Rennie L. Rhee, University of Pennsylvania, USA; Brian Rice, University of Pennsylvania, USA; Diane Robins, St. Joseph's Healthcare Hamilton, Canada; Joanna Robson, University Hospitals Bristol NHS Foundation Trust, UK; Joanna Robson, Oxford University Hospitals NHS Foundation Trust, UK; Miguel Rodrigues, Hospital Garcia de Orta, Portugal; Vasco C. Romão, Santa Maria Hospital, Portugal; Žiga Rotar, University Medical Centre Ljubljana, Slovenia; Carlee Ruediger, Queen Elizabeth Hospital, Australia; Abraham Rutgers, University Hospital Groningen UMCG, Netherlands; Ana C. Sá, Santa Maria Hospital, Portugal; Maria João Saavedra, Santa Maria Hospital, Portugal; Ken-ei Sada, Okayama University Hospital, Japan; Ilfita Sahbudin, Wye Valley NHS Trust, UK; Carlo Salvarani, Azienda Ospedaliera di Reggio Emilia, Italy; Namneet Sandhu, University of Calgary, Canada; Ernestina Santos, Centro Hospitalar do Porto, Portugal; Yuji Sato, Miyazaki University Hospital, Japan; Valentin S. Schäfer, Immanuel Krankenhaus Berlin, Medical Center for Rheumatology Berlin Buch, Germany; Franco Schiavon, Azienda Ospedaliera, University of Padua, Italy; Wolfgang A. Schmidt, Immanuel Krankenhaus Berlin, Medical Center for Rheumatology Berlin Buch, Germany; Mårten Segelmark, Linköping University, Sweden; Amira Shahin, Cairo University, Egypt; Aman Sharma, PGIMER, Chandigarh, India; Julie Shotton, NHS Grampian, UK; Cristiana Silva, Santa Maria Hospital, Portugal; Ora Gewurz Singer, University of Michigan, USA; Goutham Sivasuthan, Royal Brisbane & Women's Hospital, Australia; Susan Smolen, Mid Essex Hospital Services NHS Trust, UK; Xavier Solanich-Moreno, Hospital Bellvitge, Spain; Laura Soldevila Boixader, Hospital Bellvitge, Spain; Yeong Wook Song, Seoul National University Hospital, Korea; Jason Springer, University of Kansas Medical Center Research Institute, USA; Antoine G. Sreih, University of Pennsylvania, USA; Antoine G. Sreih, Rush University Medical Center, USA; Ragini Srivastava, Department of Rheumatology, KG Medical University, India; Lisa K. Stamp, Christchurch Hospital, University of Otago, Christchurch, New Zealand; Robert Stevens, Doncaster and Bassetlaw Hospitals NHS Foundation Trust, UK; Daniel Strbian, Helsinki University Central Hospital, Finland; Keishi Sugino, Toho University Hospital, Japan; Cord Sunderkötter, Universitätsklinikum Münster, Dermatology, Germany; Ravi Suppiah, Auckland District Health Board, New Zealand; Katsuya Suzuki, Keio University Hospital, Japan; Kazuo Suzuki, Teikyo University Hospital, Japan; Zoltán Szekanecz, University of Debrecen Medical and Health Science Center, Hungary; JanSznajd, University of Jagiellonian, Poland; Kirsi Taimen, Turku University Hospital, Finland; Paul P. Tak, Academic Medical Centre, University of Amsterdam, Netherlands; Tsutomu Takeuchi, Keio University Hospital, Japan; Naoho Takizawa, Kameda Medical Centre, Japan; Lilian Tames, Manchester University NHS Foundation Trust, UK; Bee Eng Tan, Penang General Hospital, Malaysia; Mototsugu Tanaka, University Tokyo Hospital, Japan; Man Wai Tang, Academic Medical Centre, University of Amsterdam, Netherlands; Turgut Tatlisumak, Helsinki University Central Hospital, Finland; Vladimir Tesar, General University Hospital, Prague, Czech Republic; Alan Thomas, Nottingham University Hospitals NHS Trust, UK; Xiping Tian, Peking Union Medical College Hospital, China; Kenichiro Tokunaga, Kameda Medical Centre, Japan; Enrico Tombetti, San Raffaele Scientific Institute, Italy; Matija Tomšič, University Medical Centre Ljubljana, Slovenia; Bahtiyar Toz, Istanbul University, Faculty of Medicine, Turkey; Tatsuo Tsukamoto, Kyoto University Hospital, Japan; Shunya Uchida, Teikyo University Hospital, Japan; Ali Ugur Unal, Marmara University Medical School, Turkey; Maria L. Urban, University of Parma, Azienda Ospedaliero, Italy; Joichi Usui, Tsukuba University Hospital, Japan; Augusto Vaglio, University of Parma, Azienda Ospedaliero, Italy; Srinivasan Venkatachalam, Royal Wolverhampton NHS Trust, UK; Erin Vermaak, Staffordshire & Stoke on Trent Partnership NHS Trust, UK; Vishad Viswanath, Christian Medical College & Hospital, India; Takashi Wada, Kanazawa University Hospital, Japan; Shrikant Wagh, Jehangir Clinical Development Centre, India; Daniel J. Wallace, Cedars-Sinai Medical Center, USA; Giles Walters, Canberra Hospital, Australia; Bastian Walz, Kreiskliniken Esslingen, Germany; Jin Wan, Anzhen Hospital, Capital Medical University, China; Tian Wang, Anzhen Hospital, Capital Medical University, China; Guochun Wang, China-Japan Friendship Hospital, China; Kenneth J. Warrington, Mayo Clinic, USA; Richard A. Watts, East Suffolk & North Essex NHS Foundation Trust, UK; Katarzyna Wawrzycka-Adamczyk, University of Jagiellonian, Poland; Praveen Weeratunga, University of Colombo Medical Unit, Sri Lanka; Michael H. Weisman, Cedars-Sinai Medical Center, USA; Sugeesha Wickramasinghe, University of Colombo Medical Unit, Sri Lanka; Mark Williams, Southend University Hospital NHS Foundation Trust, UK; Megan Williams, Auckland District Health Board, New Zealand; Krzysztof Wojcik, University of Jagiellonian, Poland; Laticia Woodruff, University of Alabama, Birmingham, USA; Theodoros Xenitidis, University Tuebingen, Germany; Hidehiro Yamada, St. Marianna University Hospital Internal Medicine, Japan; Kunihiro Yamagata, Tsukuba University Hospital, Japan; Chee-Seng Yee, Doncaster and Bassetlaw Hospitals NHS Foundation Trust, UK; Myeongjae Yoon, Seoul National University Hospital, Korea; Kazuki Yoshida, Kameda Medical Centre, Japan; Hajime Yoshifuji, Kyoto University Hospital, Japan; Steven R. Ytterberg, Mayo Clinic, USA; Wako Yumura, IUHW Hospital (Jichi Medical University Hospital), Japan; Hania Zayed, Cairo

University, Egypt; Xiaofeng Zeng, Peking Union Medical College Hospital, China; Ming-Hui Zhao, Peking University First Hospital, China; Anna Zugaj, University of Jagiellonian, Poland; Joanna Zuk, University of Jagiellonian, Poland.

**Funding:** The DCVAS study is sponsored and coordinated by the University of Oxford with funding support from the National Institute for Health Research Musculoskeletal Biomedical Research Unit, the University of Oxford, the Vasculitis Foundation, the American College of Rheumatology and the European League Against Rheumatism.

**Disclosure statement:** PAM reports receiving funds for consulting from AbbVie, AstraZeneca, Biogen, Boehringer-Ingelheim, Bristol-Myers Squibb, Celgene, ChemoCentryx, CSL Behring, Genentech/Roche, Genzyme/Sanofi, GlaxoSmithKline, InflaRx, Inmed, Janssen, Kiniksa and Sparrow; for research support from AstraZeneca, Boehringer-Ingelheim, Bristol-Myers Squibb, Celgene, ChemoCentryx, Genentech/Roche, GlaxoSmithKline, Kypha, TerumoBCT and royalties: UpToDate. All other authors have nothing to disclose.

## Supplementary data

Supplementary data are available at *Rheumatology* online.

## References

- Watts RA. 2. Epidemiology of giant cell arteritis: a critical review. *Rheumatology* 2014;53:i1–2.
- Calatroni M, Oliva E, Gianfreda D *et al.* ANCA-associated vasculitis in childhood: recent advances. *Ital J Pediatr* 2017;43: 46–55.
- Weiner M, Goh SM, Mohammad AJ *et al.* Outcome and treatment of elderly patients with ANCA-associated vasculitis. *Clin J Am Soc Nephrol* 2015;10:1128–35.
- Berti A, Felicetti M, Monti S *et al.* Disease and treatment-related morbidity in young and elderly patients with granulomatosis with polyangiitis and microscopic polyangiitis. *Semin Arthritis and Rheum* 2020; doi: 10.1016/j.semarthrit.2020.02.008.
- Mukhtyar C, Guillevin L, Cid MC *et al.* EULAR recommendations for the management of primary small and medium vessel vasculitis. *Ann Rheum Dis* 2009;68: 310–7.
- De Groot K, Rasmussen N, Bacon PA *et al.* Randomized trial of cyclophosphamide versus methotrexate for induction of remission in early systemic antineutrophil cytoplasmic antibody-associated vasculitis. *Arthritis Rheum* 2005;52:2461–9.
- Jayne D, Rasmussen N, Andrassy K *et al.* A randomized trial of maintenance therapy for vasculitis associated with antineutrophil cytoplasmic autoantibodies. *N Engl J Med* 2003;349:36–44.
- Hoganson DD, From AM, Michet CJ. ANCA vasculitis in the elderly. *J Clin Rheumatol* 2008;14:78–81.
- Bomback AS, Appel GB, Radhakrishnan J *et al.* ANCA-associated glomerulonephritis in the very elderly. *Kidney Int* 2011;79:757–64.
- Wang Q, van Timmeren MM, Petersen AH *et al.* Age-determined severity of anti-myeloperoxidase autoantibody-mediated glomerulonephritis in mice. *Nephrol Dial Transplant* 2017;32:254–64.
- Petersen LE, Grassi-Oliveira R, Siara T *et al.* Premature immunosenescence is associated with memory dysfunction in rheumatoid arthritis. *Neuroimmunomodulation* 2015;22:130–7.
- Berti A, Caporali R, Montecucco C, Paolazzi G, Monti S. Aging in primary systemic vasculitis: implications for diagnosis, clinical manifestations, and management. *Drugs Aging* 2019;36:53–63.
- Craven A, Robson J, Ponte C *et al.* ACR/EULAR-endorsed study to develop Diagnostic and Classification Criteria for Vasculitis (DCVAS). *Clin Exp Nephrol* 2013; 17:619–21.
- Lionaki S, Blyth ER, Hogan SL *et al.* Classification of antineutrophil cytoplasmic autoantibody vasculitides: the role of antineutrophil cytoplasmic autoantibody specificity for myeloperoxidase or proteinase 3 in disease recognition and prognosis. *Arthritis Rheum* 2012;64:3452–62.
- Mahr A, Katsahian S, Varet H *et al.* Revisiting the classification of clinical phenotypes of anti-neutrophil cytoplasmic antibody-associated vasculitis: a cluster analysis. *Ann Rheum Dis* 2013;72:1003–10.
- Schirmer JH, Wright MN, Herrmann K *et al.* Myeloperoxidase-antineutrophil cytoplasmic antibody (ANCA)-positive granulomatosis with polyangiitis (Wegener's) is a clinically distinct subset of ANCA-associated vasculitis: a retrospective analysis of 315 patients from a German Vasculitis Referral Center. *Arthritis Rheumatol* 2016;68:2953–63.
- Watts RA, Mahr A, Mohammad AJ *et al.* Classification, epidemiology and clinical subgrouping of antineutrophil cytoplasmic antibody (ANCA)-associated vasculitis. *Nephrol Dial Transplant* 2015;30:i14–22.
- Scott DGI, Watts RA. Epidemiology and clinical features of systemic vasculitis. *Clin Exp Nephrol* 2013;17:607–10.
- Monti S, Montecucco C, Pieropan S *et al.* Life-threatening onset of systemic vasculitis requiring intensive care unit admission: a case series. *Clin Exp Rheumatol* 2015;33(2 Suppl 89):S-126–131.
- Bramlage CP, Kröplin J, Wallbach M *et al.* Management of cardiovascular risk factors in patients with ANCA-associated vasculitis. *J Eval Clin Pract* 2017;23:747–54.
- Monti S, Robson J, Klersy C *et al.* Early development of new cardiovascular risk factors in the systemic vasculitides. *Clin Exp Rheumatol* 2019. <https://www.ncbi.nlm.nih.gov/pubmed/31498071>.
- Suppiah R, Judge A, Batra R *et al.* A model to predict cardiovascular events in patients with newly diagnosed Wegener's granulomatosis and microscopic polyangiitis. *Arthritis Care Res* 2011;63:588–96.
- Pagnoux C, Quéméneur T, Ninet J *et al.* Treatment of systemic necrotizing vasculitides in patients aged sixty-five years or older: results of a multicenter, open-label,

- randomized controlled trial of corticosteroid and cyclophosphamide-based induction therapy. *Arthritis Rheumatol* 2015;67:1117–27.
- 24 Little MA, Nightingale P, Verburgh CA *et al.* Early mortality in systemic vasculitis: relative contribution of adverse events and active vasculitis. *Ann Rheum Dis* 2010;69:1036–43.
- 25 Harper L, Savage CO. ANCA-associated renal vasculitis at the end of the twentieth century—a disease of older patients. *Rheumatology* 2005;44:495–501.
- 26 Chen M, Yu F, Zhang Y, Zhao M-H. Antineutrophil cytoplasmic autoantibody-associated vasculitis in older patients. *Medicine (Baltimore)* 2008;87:203–9.
